# Supplementary material
Source: PubMed Central journal article supplement (PMC166156)
Supplement: 1471-2288-3-11-s2.pdf [file 1471-2288-3-11-s2.pdf]

Supplemental Table 1. Data on first screening

| age <sup>2</sup> | FP <sup>5</sup> | counts for FP defined as |                    |
|------------------|-----------------|--------------------------|--------------------|
|                  |                 | narrow <sup>6</sup>      | broad <sup>7</sup> |
| 1                | 0               | 4272                     | 3961               |
| 1                | 1               | 58                       | 369                |
| 2                | 0               | 4867                     | 4467               |
| 2                | 1               | 83                       | 483                |
| 3                | 0               | 4509                     | 4202               |
| 3                | 1               | 82                       | 389                |
| 4                | 0               | 3804                     | 3518               |
| 4                | 1               | 59                       | 345                |
| 5                | 0               | 2362                     | 2194               |
| 5                | 1               | 32                       | 200                |

<sup>2</sup>age category = 1 if 40-44; 2 if 45-49; 3 if 50-54; 4 if 55-59; 5 if 60-64;

<sup>5</sup>current FP = 0 if not a false positive and 1 if a false positive

<sup>6</sup>narrow definition of FP is an unnecessary biopsy

<sup>7</sup>broad definition of FP is an unnecessary work-up

Supplemental Table 2. Data on screens after the first

| previous FP <sup>1</sup> | age <sup>2</sup> | time <sup>3</sup> | screen <sup>4</sup> | FP <sup>5</sup> | counts for FP current defined as |                    |
|--------------------------|------------------|-------------------|---------------------|-----------------|----------------------------------|--------------------|
|                          |                  |                   |                     |                 | narrow <sup>6</sup>              | broad <sup>7</sup> |
| 0                        | 1                | 1                 | 2                   | 0               | 1143                             | 1017               |
| 0                        | 1                | 1                 | 2                   | 1               | 13                               | 53                 |
| 0                        | 1                | 1                 | 3                   | 0               | 580                              | 494                |
| 0                        | 1                | 1                 | 3                   | 1               | 3                                | 23                 |
| 0                        | 1                | 1                 | 4                   | 0               | 197                              | 152                |
| 0                        | 1                | 1                 | 4                   | 1               | 1                                | 8                  |
| 0                        | 1                | 2                 | 2                   | 0               | 1052                             | 921                |
| 0                        | 1                | 2                 | 2                   | 1               | 7                                | 59                 |
| 0                        | 1                | 2                 | 3                   | 0               | 623                              | 530                |
| 0                        | 1                | 2                 | 3                   | 1               | 2                                | 18                 |
| 0                        | 1                | 2                 | 4                   | 0               | 238                              | 200                |
| 0                        | 1                | 2                 | 4                   | 1               | 0                                | 8                  |
| 0                        | 1                | 3                 | 2                   | 0               | 224                              | 200                |
| 0                        | 1                | 3                 | 2                   | 1               | 2                                | 8                  |
| 0                        | 1                | 3                 | 3                   | 0               | 102                              | 93                 |

|   |   |   |   |   |      |      |
|---|---|---|---|---|------|------|
| 0 | 1 | 3 | 3 | 1 | 1    | 3    |
| 0 | 1 | 3 | 4 | 0 | 21   | 18   |
| 0 | 1 | 3 | 4 | 1 | 0    | 1    |
| 0 | 1 | 4 | 2 | 0 | 153  | 135  |
| 0 | 1 | 4 | 2 | 1 | 1    | 10   |
| 0 | 1 | 4 | 3 | 0 | 43   | 37   |
| 0 | 1 | 4 | 3 | 1 | 0    | 2    |
| 0 | 1 | 4 | 4 | 0 | 2    | 1    |
| 0 | 1 | 4 | 4 | 1 | 0    | 0    |
| 0 | 2 | 1 | 2 | 0 | 1811 | 1599 |
| 0 | 2 | 1 | 2 | 1 | 18   | 77   |
| 0 | 2 | 1 | 3 | 0 | 1681 | 1389 |
| 0 | 2 | 1 | 3 | 1 | 11   | 78   |
| 0 | 2 | 1 | 4 | 0 | 1215 | 950  |
| 0 | 2 | 1 | 4 | 1 | 12   | 44   |
| 0 | 2 | 2 | 2 | 0 | 1757 | 1549 |
| 0 | 2 | 2 | 2 | 1 | 21   | 73   |
| 0 | 2 | 2 | 3 | 0 | 1714 | 1477 |
| 0 | 2 | 2 | 3 | 1 | 13   | 79   |
| 0 | 2 | 2 | 4 | 0 | 1620 | 1362 |
| 0 | 2 | 2 | 4 | 1 | 15   | 49   |
| 0 | 2 | 3 | 2 | 0 | 320  | 282  |
| 0 | 2 | 3 | 2 | 1 | 6    | 11   |
| 0 | 2 | 3 | 3 | 0 | 266  | 221  |
| 0 | 2 | 3 | 3 | 1 | 3    | 15   |
| 0 | 2 | 3 | 4 | 0 | 196  | 165  |
| 0 | 2 | 3 | 4 | 1 | 1    | 5    |
| 0 | 2 | 4 | 2 | 0 | 437  | 395  |
| 0 | 2 | 4 | 2 | 1 | 6    | 22   |
| 0 | 2 | 4 | 3 | 0 | 231  | 197  |
| 0 | 2 | 4 | 3 | 1 | 4    | 6    |
| 0 | 2 | 4 | 4 | 0 | 42   | 34   |
| 0 | 2 | 4 | 4 | 1 | 1    | 1    |
| 0 | 3 | 1 | 2 | 0 | 1662 | 1493 |
| 0 | 3 | 1 | 2 | 1 | 7    | 55   |
| 0 | 3 | 1 | 3 | 0 | 1589 | 1374 |
| 0 | 3 | 1 | 3 | 1 | 9    | 58   |
| 0 | 3 | 1 | 4 | 0 | 1087 | 882  |
| 0 | 3 | 1 | 4 | 1 | 13   | 47   |
| 0 | 3 | 2 | 2 | 0 | 1634 | 1482 |
| 0 | 3 | 2 | 2 | 1 | 13   | 71   |
| 0 | 3 | 2 | 3 | 0 | 1488 | 1309 |
| 0 | 3 | 2 | 3 | 1 | 10   | 40   |
| 0 | 3 | 2 | 4 | 0 | 1467 | 1277 |
| 0 | 3 | 2 | 4 | 1 | 10   | 44   |

|   |   |   |   |   |      |      |
|---|---|---|---|---|------|------|
| 0 | 3 | 3 | 2 | 0 | 291  | 261  |
| 0 | 3 | 3 | 2 | 1 | 1    | 8    |
| 0 | 3 | 3 | 3 | 0 | 218  | 185  |
| 0 | 3 | 3 | 3 | 1 | 2    | 9    |
| 0 | 3 | 3 | 4 | 0 | 193  | 164  |
| 0 | 3 | 3 | 4 | 1 | 2    | 10   |
| 0 | 3 | 4 | 2 | 0 | 406  | 364  |
| 0 | 3 | 4 | 2 | 1 | 2    | 20   |
| 0 | 3 | 4 | 3 | 0 | 204  | 174  |
| 0 | 3 | 4 | 3 | 1 | 2    | 4    |
| 0 | 3 | 4 | 4 | 0 | 48   | 38   |
| 0 | 3 | 4 | 4 | 1 | 0    | 1    |
| 0 | 4 | 1 | 2 | 0 | 1534 | 1388 |
| 0 | 4 | 1 | 2 | 1 | 10   | 50   |
| 0 | 4 | 1 | 3 | 0 | 1461 | 1272 |
| 0 | 4 | 1 | 3 | 1 | 6    | 53   |
| 0 | 4 | 1 | 4 | 0 | 1068 | 883  |
| 0 | 4 | 1 | 4 | 1 | 5    | 27   |
| 0 | 4 | 2 | 2 | 0 | 1409 | 1247 |
| 0 | 4 | 2 | 2 | 1 | 5    | 54   |
| 0 | 4 | 2 | 3 | 0 | 1296 | 1141 |
| 0 | 4 | 2 | 3 | 1 | 8    | 50   |
| 0 | 4 | 2 | 4 | 0 | 1316 | 1135 |
| 0 | 4 | 2 | 4 | 1 | 11   | 36   |
| 0 | 4 | 3 | 2 | 0 | 284  | 255  |
| 0 | 4 | 3 | 2 | 1 | 2    | 10   |
| 0 | 4 | 3 | 3 | 0 | 217  | 180  |
| 0 | 4 | 3 | 3 | 1 | 1    | 8    |
| 0 | 4 | 3 | 4 | 0 | 182  | 159  |
| 0 | 4 | 3 | 4 | 1 | 1    | 3    |
| 0 | 4 | 4 | 2 | 0 | 338  | 301  |
| 0 | 4 | 4 | 2 | 1 | 2    | 17   |
| 0 | 4 | 4 | 3 | 0 | 194  | 159  |
| 0 | 4 | 4 | 3 | 1 | 1    | 4    |
| 0 | 4 | 4 | 4 | 0 | 36   | 26   |
| 0 | 4 | 4 | 4 | 1 | 0    | 1    |
| 0 | 5 | 1 | 2 | 0 | 925  | 829  |
| 0 | 5 | 1 | 2 | 1 | 11   | 43   |
| 0 | 5 | 1 | 3 | 0 | 979  | 850  |
| 0 | 5 | 1 | 3 | 1 | 6    | 31   |
| 0 | 5 | 1 | 4 | 0 | 700  | 587  |
| 0 | 5 | 1 | 4 | 1 | 6    | 20   |
| 0 | 5 | 2 | 2 | 0 | 898  | 808  |
| 0 | 5 | 2 | 2 | 1 | 6    | 37   |
| 0 | 5 | 2 | 3 | 0 | 875  | 762  |

|   |   |   |   |   |     |     |
|---|---|---|---|---|-----|-----|
| 0 | 5 | 2 | 3 | 1 | 3   | 26  |
| 0 | 5 | 2 | 4 | 0 | 937 | 817 |
| 0 | 5 | 2 | 4 | 1 | 11  | 22  |
| 0 | 5 | 3 | 2 | 0 | 171 | 151 |
| 0 | 5 | 3 | 2 | 1 | 1   | 6   |
| 0 | 5 | 3 | 3 | 0 | 137 | 119 |
| 0 | 5 | 3 | 3 | 1 | 1   | 5   |
| 0 | 5 | 3 | 4 | 0 | 135 | 111 |
| 0 | 5 | 3 | 4 | 1 | 1   | 4   |
| 0 | 5 | 4 | 2 | 0 | 249 | 226 |
| 0 | 5 | 4 | 2 | 1 | 1   | 9   |
| 0 | 5 | 4 | 3 | 0 | 144 | 124 |
| 0 | 5 | 4 | 3 | 1 | 1   | 4   |
| 0 | 5 | 4 | 4 | 0 | 35  | 30  |
| 0 | 5 | 4 | 4 | 1 | 1   | 2   |
| 1 | 1 | 1 | 2 | 0 | 15  | 75  |
| 1 | 1 | 1 | 2 | 1 | 4   | 30  |
| 1 | 1 | 1 | 3 | 0 | 14  | 63  |
| 1 | 1 | 1 | 3 | 1 | 4   | 21  |
| 1 | 1 | 1 | 4 | 0 | 9   | 38  |
| 1 | 1 | 1 | 4 | 1 | 1   | 10  |
| 1 | 1 | 2 | 2 | 0 | 19  | 82  |
| 1 | 1 | 2 | 2 | 1 | 0   | 16  |
| 1 | 1 | 2 | 3 | 0 | 16  | 75  |
| 1 | 1 | 2 | 3 | 1 | 0   | 18  |
| 1 | 1 | 2 | 4 | 0 | 4   | 32  |
| 1 | 1 | 2 | 4 | 1 | 0   | 2   |
| 1 | 1 | 3 | 2 | 0 | 0   | 16  |
| 1 | 1 | 3 | 2 | 1 | 0   | 2   |
| 1 | 1 | 3 | 3 | 0 | 0   | 7   |
| 1 | 1 | 3 | 3 | 1 | 0   | 0   |
| 1 | 1 | 3 | 4 | 0 | 0   | 2   |
| 1 | 1 | 3 | 4 | 1 | 0   | 0   |
| 1 | 1 | 4 | 2 | 0 | 0   | 5   |
| 1 | 1 | 4 | 2 | 1 | 0   | 4   |
| 1 | 1 | 4 | 3 | 0 | 2   | 5   |
| 1 | 1 | 4 | 3 | 1 | 0   | 1   |
| 1 | 1 | 4 | 4 | 0 | 0   | 1   |
| 1 | 1 | 4 | 4 | 1 | 0   | 0   |
| 1 | 2 | 1 | 2 | 0 | 27  | 149 |
| 1 | 2 | 1 | 2 | 1 | 0   | 31  |
| 1 | 2 | 1 | 3 | 0 | 41  | 219 |
| 1 | 2 | 1 | 3 | 1 | 2   | 49  |
| 1 | 2 | 1 | 4 | 0 | 46  | 216 |
| 1 | 2 | 1 | 4 | 1 | 2   | 65  |

|   |   |   |   |   |    |     |
|---|---|---|---|---|----|-----|
| 1 | 2 | 2 | 2 | 0 | 20 | 136 |
| 1 | 2 | 2 | 2 | 1 | 5  | 45  |
| 1 | 2 | 2 | 3 | 0 | 30 | 157 |
| 1 | 2 | 2 | 3 | 1 | 1  | 45  |
| 1 | 2 | 2 | 4 | 0 | 37 | 223 |
| 1 | 2 | 2 | 4 | 1 | 3  | 41  |
| 1 | 2 | 3 | 2 | 0 | 2  | 28  |
| 1 | 2 | 3 | 2 | 1 | 1  | 8   |
| 1 | 2 | 3 | 3 | 0 | 9  | 39  |
| 1 | 2 | 3 | 3 | 1 | 1  | 4   |
| 1 | 2 | 3 | 4 | 0 | 5  | 27  |
| 1 | 2 | 3 | 4 | 1 | 0  | 5   |
| 1 | 2 | 4 | 2 | 0 | 6  | 24  |
| 1 | 2 | 4 | 2 | 1 | 0  | 8   |
| 1 | 2 | 4 | 3 | 0 | 3  | 32  |
| 1 | 2 | 4 | 3 | 1 | 1  | 4   |
| 1 | 2 | 4 | 4 | 0 | 0  | 7   |
| 1 | 2 | 4 | 4 | 1 | 0  | 1   |
| 1 | 3 | 1 | 2 | 0 | 30 | 119 |
| 1 | 3 | 1 | 2 | 1 | 3  | 35  |
| 1 | 3 | 1 | 3 | 0 | 42 | 172 |
| 1 | 3 | 1 | 3 | 1 | 4  | 40  |
| 1 | 3 | 1 | 4 | 0 | 36 | 168 |
| 1 | 3 | 1 | 4 | 1 | 4  | 43  |
| 1 | 3 | 2 | 2 | 0 | 20 | 93  |
| 1 | 3 | 2 | 2 | 1 | 3  | 24  |
| 1 | 3 | 2 | 3 | 0 | 23 | 150 |
| 1 | 3 | 2 | 3 | 1 | 3  | 25  |
| 1 | 3 | 2 | 4 | 0 | 36 | 172 |
| 1 | 3 | 2 | 4 | 1 | 3  | 23  |
| 1 | 3 | 3 | 2 | 0 | 1  | 18  |
| 1 | 3 | 3 | 2 | 1 | 0  | 6   |
| 1 | 3 | 3 | 3 | 0 | 7  | 25  |
| 1 | 3 | 3 | 3 | 1 | 1  | 9   |
| 1 | 3 | 3 | 4 | 0 | 4  | 25  |
| 1 | 3 | 3 | 4 | 1 | 1  | 1   |
| 1 | 3 | 4 | 2 | 0 | 10 | 25  |
| 1 | 3 | 4 | 2 | 1 | 0  | 9   |
| 1 | 3 | 4 | 3 | 0 | 6  | 29  |
| 1 | 3 | 4 | 3 | 1 | 0  | 5   |
| 1 | 3 | 4 | 4 | 0 | 3  | 11  |
| 1 | 3 | 4 | 4 | 1 | 0  | 1   |
| 1 | 4 | 1 | 2 | 0 | 20 | 105 |
| 1 | 4 | 1 | 2 | 1 | 2  | 23  |
| 1 | 4 | 1 | 3 | 0 | 35 | 141 |

|   |   |   |   |   |    |     |
|---|---|---|---|---|----|-----|
| 1 | 4 | 1 | 3 | 1 | 1  | 37  |
| 1 | 4 | 1 | 4 | 0 | 35 | 164 |
| 1 | 4 | 1 | 4 | 1 | 0  | 34  |
| 1 | 4 | 2 | 2 | 0 | 19 | 112 |
| 1 | 4 | 2 | 2 | 1 | 3  | 23  |
| 1 | 4 | 2 | 3 | 0 | 19 | 118 |
| 1 | 4 | 2 | 3 | 1 | 1  | 15  |
| 1 | 4 | 2 | 4 | 0 | 25 | 161 |
| 1 | 4 | 2 | 4 | 1 | 0  | 20  |
| 1 | 4 | 3 | 2 | 0 | 5  | 23  |
| 1 | 4 | 3 | 2 | 1 | 0  | 3   |
| 1 | 4 | 3 | 3 | 0 | 4  | 32  |
| 1 | 4 | 3 | 3 | 1 | 0  | 2   |
| 1 | 4 | 3 | 4 | 0 | 3  | 23  |
| 1 | 4 | 3 | 4 | 1 | 0  | 1   |
| 1 | 4 | 4 | 2 | 0 | 0  | 21  |
| 1 | 4 | 4 | 2 | 1 | 0  | 1   |
| 1 | 4 | 4 | 3 | 0 | 4  | 32  |
| 1 | 4 | 4 | 3 | 1 | 0  | 4   |
| 1 | 4 | 4 | 4 | 0 | 1  | 10  |
| 1 | 4 | 4 | 4 | 1 | 0  | 0   |
| 1 | 5 | 1 | 2 | 0 | 7  | 57  |
| 1 | 5 | 1 | 2 | 1 | 2  | 16  |
| 1 | 5 | 1 | 3 | 0 | 20 | 104 |
| 1 | 5 | 1 | 3 | 1 | 2  | 22  |
| 1 | 5 | 1 | 4 | 0 | 27 | 101 |
| 1 | 5 | 1 | 4 | 1 | 0  | 25  |
| 1 | 5 | 2 | 2 | 0 | 12 | 62  |
| 1 | 5 | 2 | 2 | 1 | 2  | 11  |
| 1 | 5 | 2 | 3 | 0 | 16 | 92  |
| 1 | 5 | 2 | 3 | 1 | 0  | 14  |
| 1 | 5 | 2 | 4 | 0 | 24 | 119 |
| 1 | 5 | 2 | 4 | 1 | 1  | 15  |
| 1 | 5 | 3 | 2 | 0 | 2  | 16  |
| 1 | 5 | 3 | 2 | 1 | 0  | 1   |
| 1 | 5 | 3 | 3 | 0 | 4  | 15  |
| 1 | 5 | 3 | 3 | 1 | 0  | 3   |
| 1 | 5 | 3 | 4 | 0 | 6  | 24  |
| 1 | 5 | 3 | 4 | 1 | 0  | 3   |
| 1 | 5 | 4 | 2 | 0 | 2  | 15  |
| 1 | 5 | 4 | 2 | 1 | 1  | 3   |
| 1 | 5 | 4 | 3 | 0 | 5  | 17  |
| 1 | 5 | 4 | 3 | 1 | 0  | 5   |
| 1 | 5 | 4 | 4 | 0 | 1  | 5   |
| 1 | 5 | 4 | 4 | 1 | 2  | 2   |

---

<sup>1</sup>previous FP = 0 if none and 1 if at least one.

<sup>2</sup>age category = 1 if 40-44; 2 if 45-49; 3 if 50-54; 4 if 55-59; 5 if 60-64;

<sup>3</sup>time interval since last screen = 1 if 9-12 months, 2 if 13-15 months, 3 if 16-18 months,  
4 if 19 or more months

<sup>4</sup>screen number starting with screen 2

<sup>5</sup>current FP = 0 if not a false positive and 1 if a false positive

<sup>6</sup>narrow definition of FP is an unnecessary biopsy

<sup>7</sup>broad definition of FP is an unnecessary work-up
